# Supplementary material for: Transcriptomes of Wet Skin Biopsies Predict Outcomes after Ionizing Radiation Exposure with Potential Dosimetric Applications in a Mouse Model
Source: MDPI journal article supplement (doi:10.3390/cimb44080254), 2022-08-18

**Supplementary Table S1.** Time point-based Comparison of SDTGs ( $p < 0.05$  and  $FC \geq 2$ ) distribution among sublethal IR doses

| Time point | Union | Common in all Doses | Dose-unique (comparison of BSDs only) |              |               |
|------------|-------|---------------------|---------------------------------------|--------------|---------------|
|            |       |                     | 1Gy                                   | 3Gy          | 6Gy           |
| 2h         | 394   | 58<br>14.72%        | 117<br>29.69%                         | 23<br>5.83%  | 58<br>14.72%  |
| d4         | 459   | 48<br>10.45%        | 159<br>34.64%                         | 19<br>4.13%  | 137<br>29.84% |
| d7         | 455   | 26<br>5.71%         | 42<br>9.23%                           | 9<br>1.97%   | 287<br>63.07% |
| d21        | 314   | 5<br>1.47%          | 47<br>14.96%                          | 76<br>24.20% | 118<br>37.57% |
| d28        | 322   | 19<br>5.90%         | 21<br>6.52%                           | 66<br>20.49% | 112<br>34.78% |

**Supplementary Table S2.** Top SDTGs in BLD with an average fold change regulation larger than ten (Ave  $FC > 10$  and  $p < 0.05$ ) in all time points.

| Symbol                 | Entrez Gene Name                                  | Fold change (FC) |         |         | Location            | Function    |
|------------------------|---------------------------------------------------|------------------|---------|---------|---------------------|-------------|
|                        |                                                   | h2               | d4      | d7      |                     |             |
| Ctla2a/Ctla2b          | cytotoxic T lymphocyte-associated protein 2 alpha | 9.981            | 14.219  | 14.814  | Plasma Membrane     | other       |
| S100A9                 | S100 calcium binding protein A9                   | 7.161            | 11.249  | 12.778  | Cytoplasm           | other       |
| TMEM37*                | transmembrane protein 37                          | 9.533            | 10.832  | 10.335  | Plasma Membrane     | ion channel |
| COL3A1*                | collagen type III alpha 1 chain                   | -31.753          | -26.584 | -47.74  | Extracellular Space | other       |
| COL1A1                 | collagen type I alpha 1 chain                     | -24.315          | -23.331 | -35.277 | Extracellular Space | other       |
| COL1A2*                | collagen type I alpha 2 chain                     | -22.209          | -20.323 | -31.159 | Extracellular Space | other       |
| FA2H                   | fatty acid 2-hydroxylase                          | -20.851          | -16.568 | -23.311 | Cytoplasm           | enzyme      |
| Mup1 (includes others) | major urinary protein 1                           | -17.097          | -15.839 | -20.242 | Extracellular Space | other       |
| DHCR24                 | 24-dehydrocholesterol reductase                   | -14.088          | -12.843 | -14.346 | Cytoplasm           | enzyme      |
| KRT1                   | keratin 1                                         | -12.075          | -11.79  | -14.346 | Cytoplasm           | other       |
| LUM                    | lumican                                           | -12.706          | -9.105  | -13.944 | Extracellular Space | other       |
| RNASE2                 | ribonuclease A family member 2                    | -11.398          | -10.353 | -12.541 | Cytoplasm           | enzyme      |
| KRT79                  | keratin 79                                        | -11.132          | -10.281 | -10.57  | Extracellular Space | other       |
| CIDEA                  | cell death inducing DFFA like effector a          | -11.378          | -9.54   | -10.169 | Cytoplasm           | other       |
| MGLL                   | monoglyceride lipase                              | -9.456           | -9.85   | -11.687 | Plasma Membrane     | enzyme      |
| KRT75*                 | keratin 75                                        | -10.52           | -9.371  | -10.211 | Cytoplasm           | other       |

\*Denote genes that are unique to the 20Gy lethal dose (i.e., not significantly differentially regulated in any sublethal doses).

**Supplementary Figure S1.** Significantly ( $\text{Abs } z\text{-score} \geq 2$  and  $-\log p \geq 1.3$ ) modulated pathways in at least one time point from the analysis of SDTGs ( $p \leq 0.05$  and  $\text{Abs FC} \geq 2$ ) at h2, d4, and d7 TPs in lethal (20Gy) and sublethal IR doses (1, 3, 6Gy). Color of squares ranges according to modulation intensity from dark blue for inactivation to dark red for activation prediction based on z-score values.

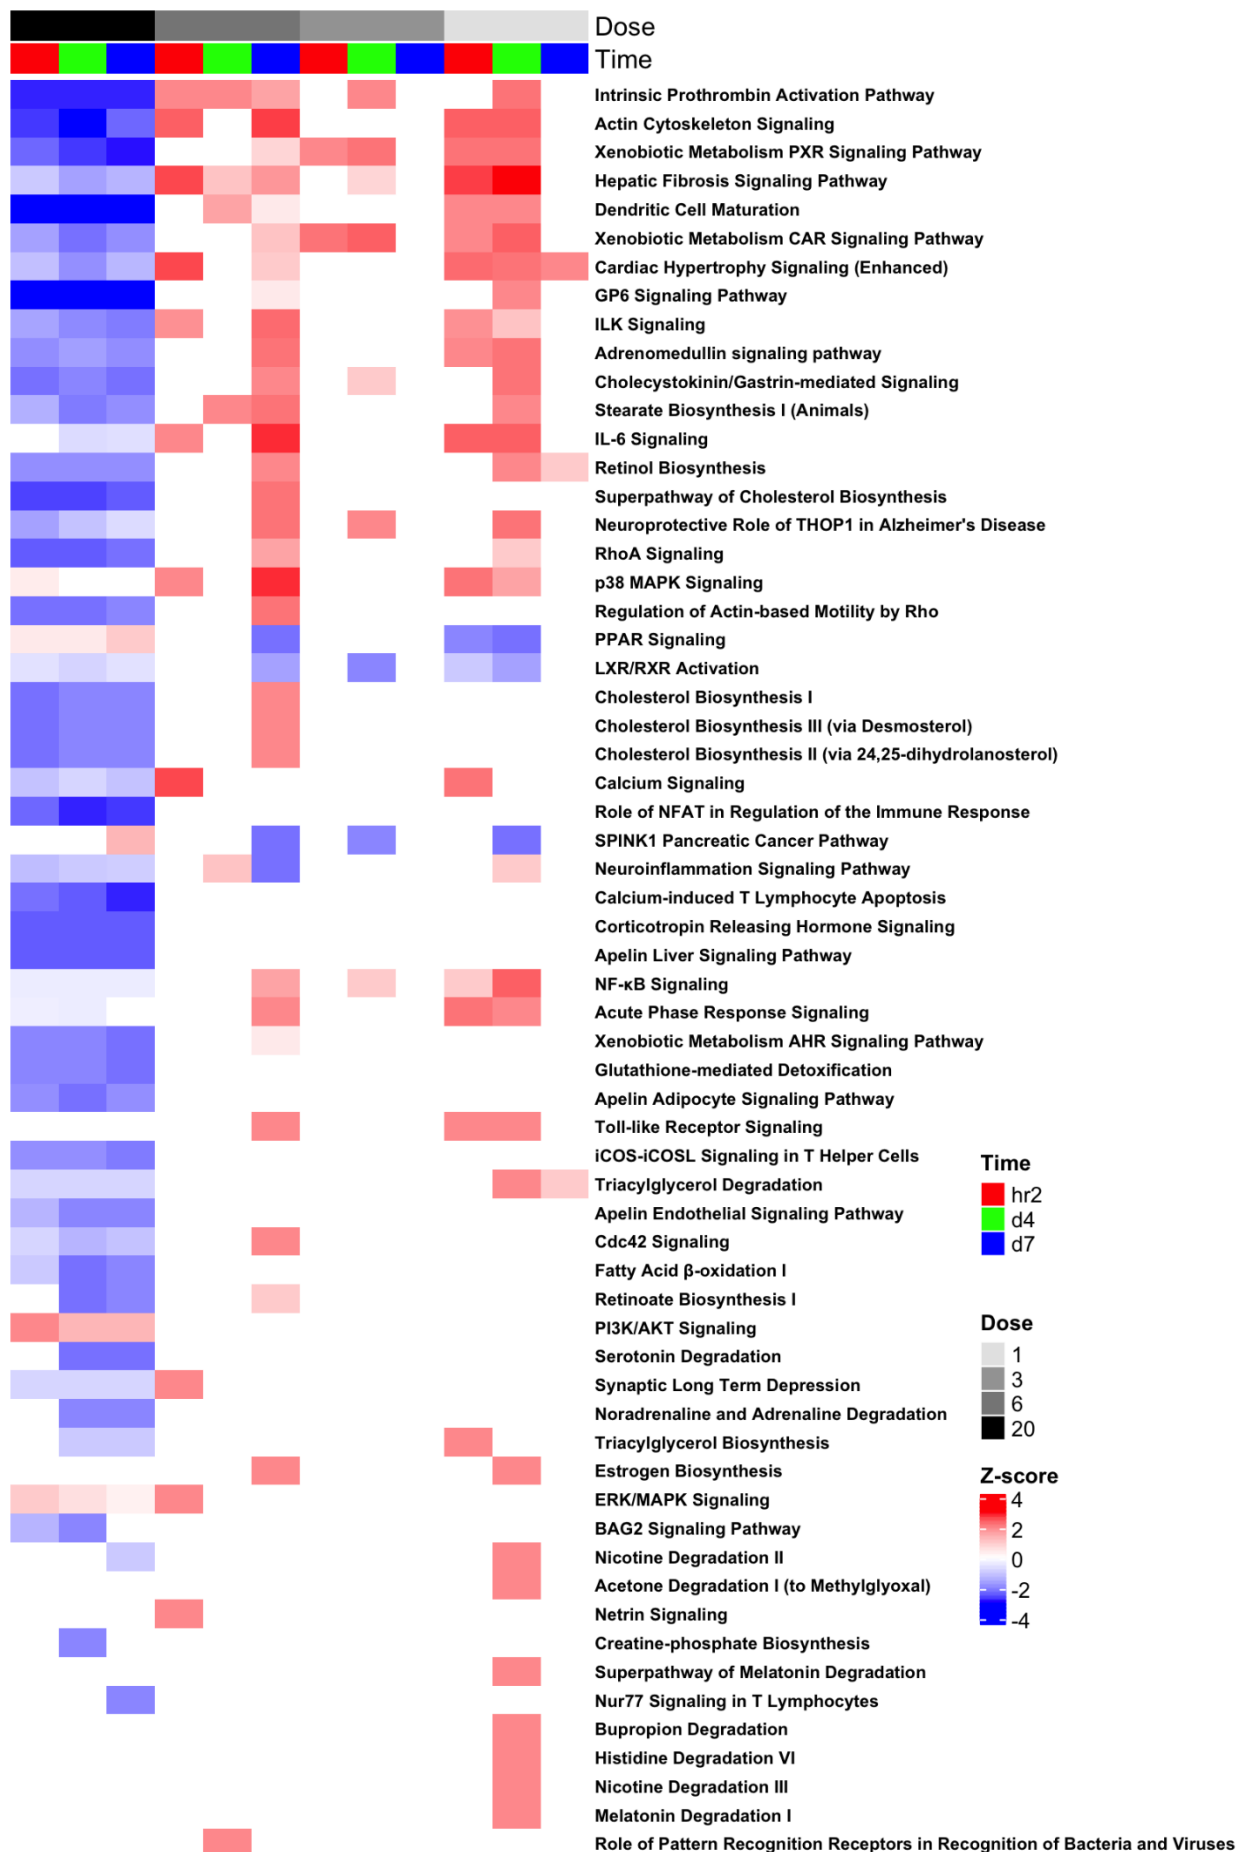

Supplement: s1 [file s1]
